# Supplementary material
Source: PubMed Central journal article supplement (PMC3340205)
Supplement: supp_M111.323782_0550-Supplemental_Figure_legend_and_figures.pdf [file supp_M111.323782_0550-Supplemental_Figure_legend_and_figures.pdf]

## SUPPLEMENTAL DATA

**Figure S1. Brefeldin A treatment (BFA) destroys the structure of the trans-Golgi network.** HA- $\beta$ 1AR cells were surface-labeled with HA mAb were incubated with ISO and BFA (5  $\mu$ g/ml) at 37 °C, fixed at 4h and immunostained for  $\beta$ 1AR (red) and TGN46 (green).

**Figure S2. Brefeldin A treatment does not influence the endocytosis of  $\beta$ 1AR.** Surface-labeled HA- $\beta$ 1AR cells were incubated at 37 °C with ISO and BFA or vehicle and fixed at 20 min. Surface and endocytosed receptors were visualized with goat anti-rabbit Alexa-594 (red). The nuclei were detected with DAPI (blue).

**Figure S3. Brefeldin A treatment neither impacts the distribution of EEA-1 nor alters the colocalization of endocytosis of  $\beta$ 1AR with EEA-1.** Surface-labeled HA- $\beta$ 1AR cells were incubated at 37 °C with ISO and BFA or vehicle, fixed at 4h and immunostained for  $\beta$ 1AR (red) and EEA-1 (green). Colocalization of HA- $\beta$ 1AR with EEA-1 was shown in yellow in the merged images. The bottom panels show quantitative colocalization analysis using linescan.

**Figure S4. Brefeldin A treatment blocks the entry of endocytosed  $\beta$ 1AR into the late endosomes.** Surface-labeled HA- $\beta$ 1AR cells were incubated at 37 °C with ISO and BFA or vehicle, fixed at 4h and immunostained for  $\beta$ 1AR (red) and Rab-7 (green). Colocalization of HA- $\beta$ 1AR with Rab-7 was shown in yellow in the merged images. The bottom panels show quantitative colocalization analysis using linescan.

**Figure S5. Endocytosed  $\beta$ 1AR does not accumulate in the endoplasmic reticulum after Brefeldin A treatment.** Surface-labeled HA- $\beta$ 1AR cells were incubated at 37 °C with ISO and BFA or vehicle, fixed at 4h and immunostained for  $\beta$ 1AR (red) and calnexin (green). Colocalization of HA- $\beta$ 1AR with Rab-7 was shown in yellow in the merged images. The bottom panels show quantitative colocalization analysis using linescan.

**Figure S6. Co-localization of  $\beta$ 1AR with GFP-arrestin-3 in response to ISO stimulation.** HA- $\beta$ 1AR cells were transfected with cDNA encoding GFP-arrestin-3 and surface-labeled with rabbit HA antibody. Cells were incubated with ISO at 37 °C, fixed at indicated time points and immunostained for surface and endocytosed  $\beta$ 1AR (red). Note: ISO stimulation triggers GFP-arrestin-3 forming punctures before  $\beta$ 1AR endocytosis at 2 min. Images were selected from 120 cells in 3 independent experiments.

$\beta$ 1AR

TGN46

Merge

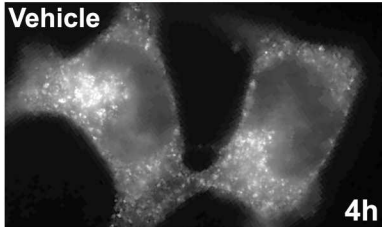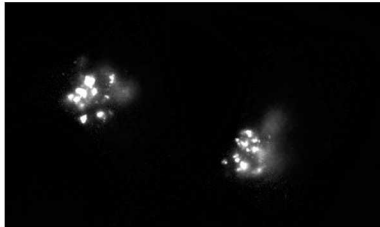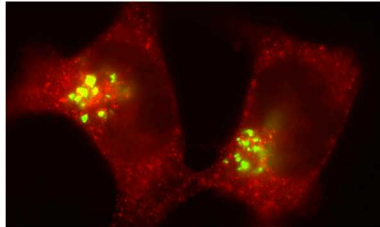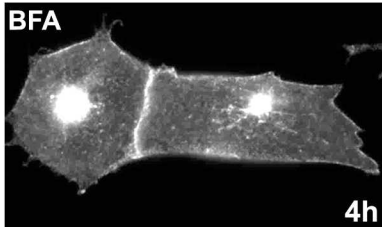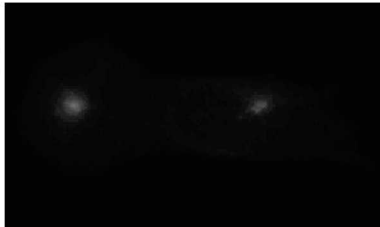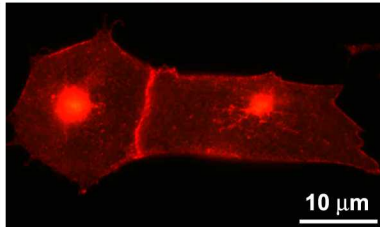

**Fig. S1**

$\beta$ 1AR

$\beta$ 1AR + DAPI

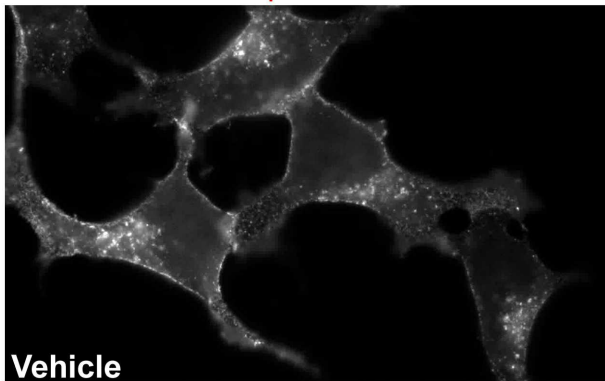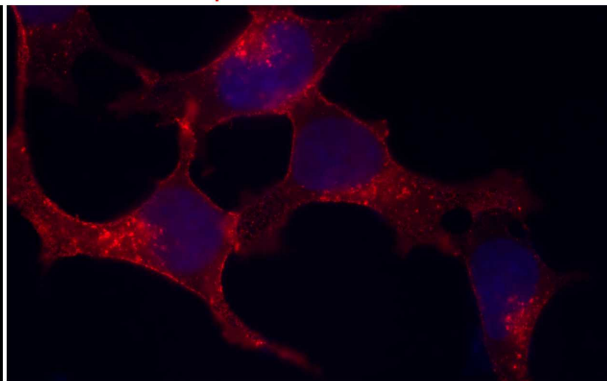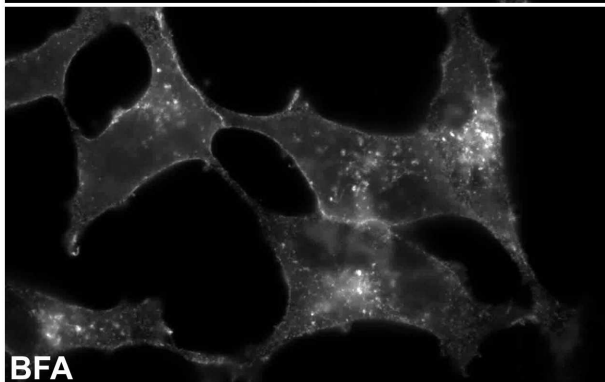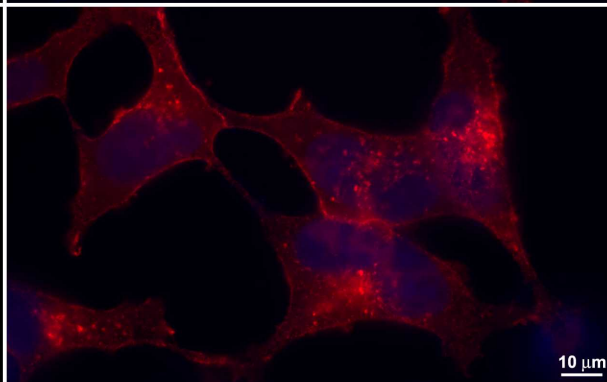

Fig. S2

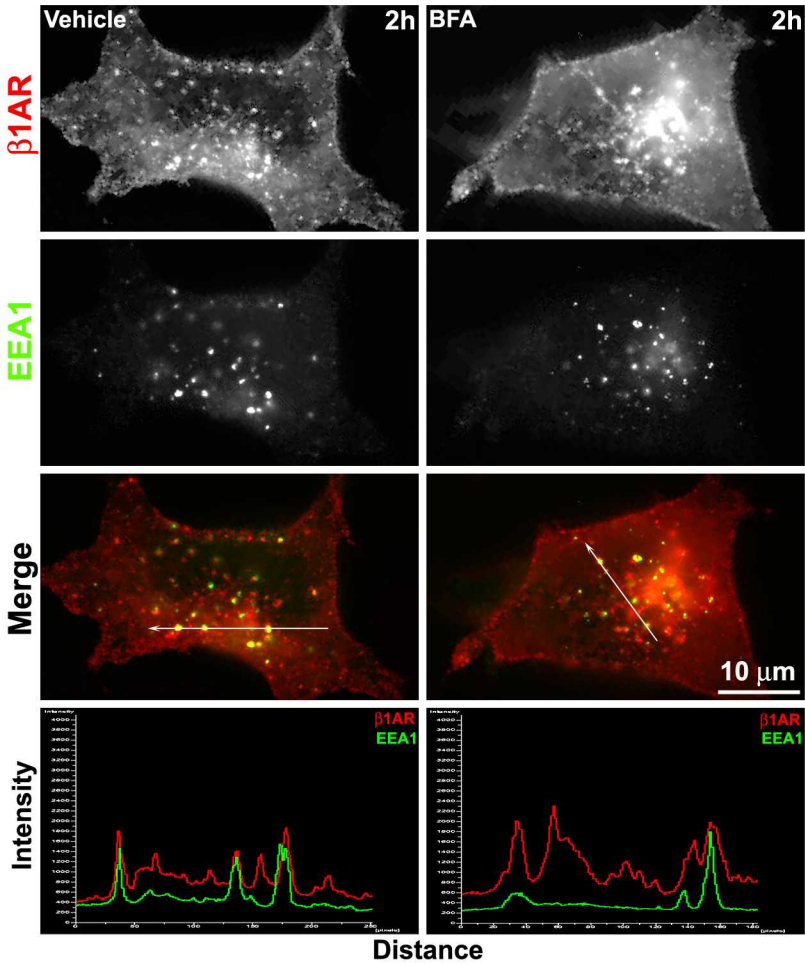

**Fig. S3**

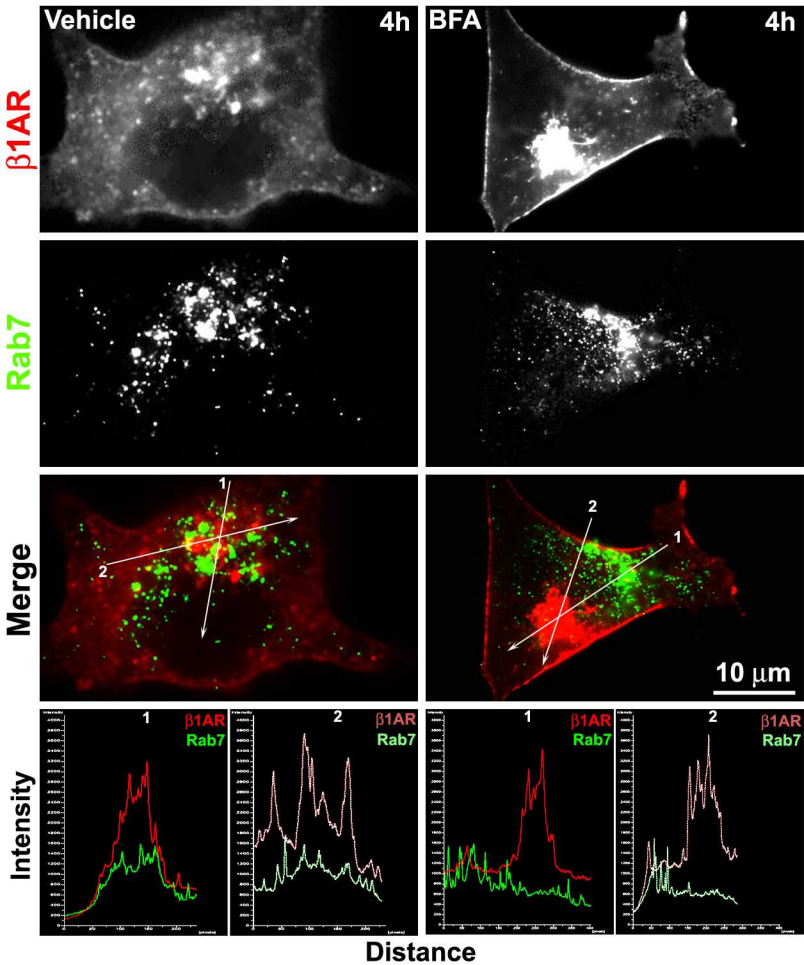

Fig. S4



**$\beta$ 1-AR****Arrestin3-GFP****Merge****0min**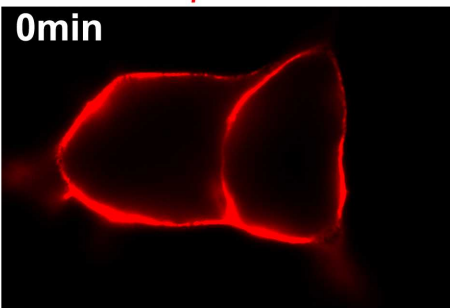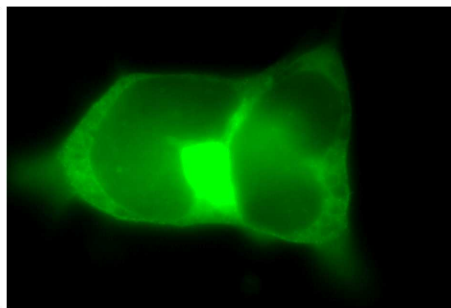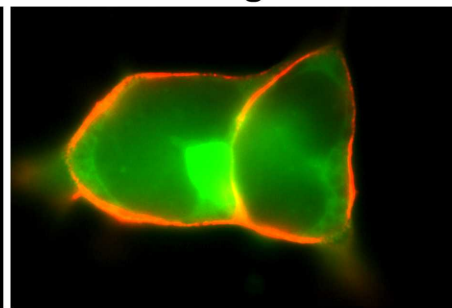**2min**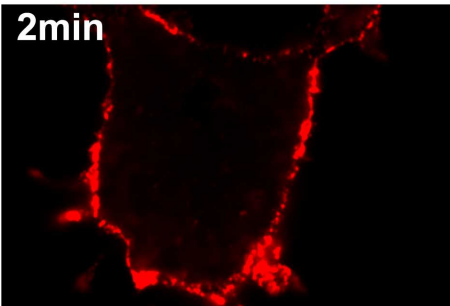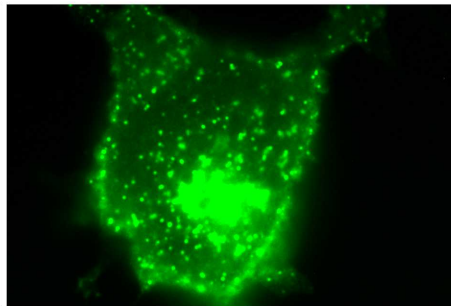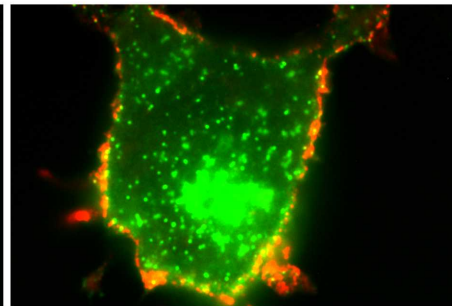**30min**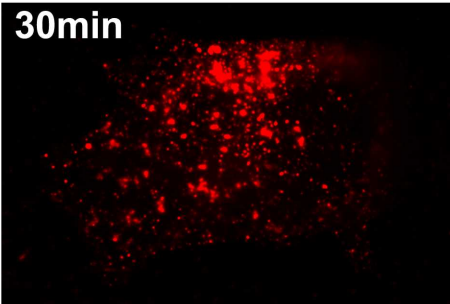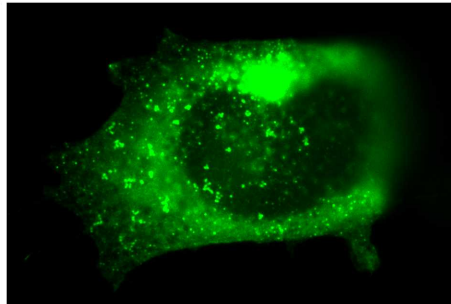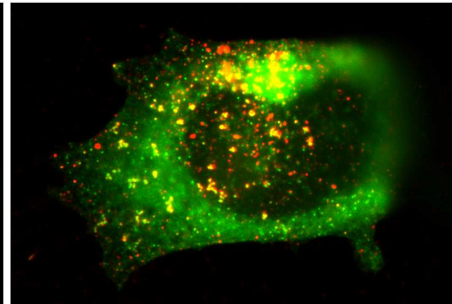**60min**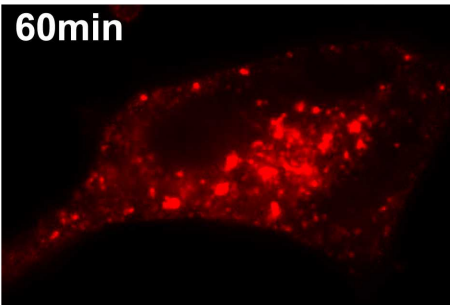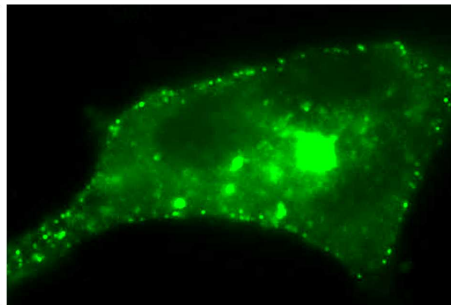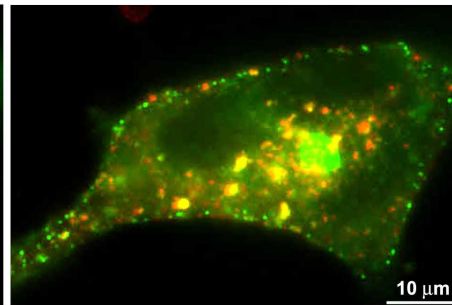10  $\mu$ m**Fig. S6**
